1 **Early surveillance and public health emergency disposal measures**  
2 **between novel coronavirus disease 2019 and avian influenza in China:**  
3 **a case-comparison study**

4 Tiantian Zhang<sup>1,2#</sup> Ph.D, Wenming Shi<sup>1,2#</sup> MSc, Ying Wang<sup>1</sup> Ph.D, Ge Bai<sup>1</sup> Ph.D,  
5 Ruiming Dai<sup>1</sup> MSc, Qian Wang<sup>1</sup> Ph.D, Li Luo<sup>1,2\*</sup> Ph.D

6 1. School of Public Health, Fudan University, Shanghai 200032, China

7 2. Key Laboratory of Public Health Safety of the Ministry of Education and Key

8 Laboratory of Health Technology Assessment of the Ministry of Health, Fudan

9 University, Shanghai 200032, China

10

11 **#These two authors contribute equally to this paper.**

12 **\*Correspondence:** Li Luo, Prof. Dr. E-mail: liluo@fudan.edu.cn

13

14 **Abstract**

15 **Background:** The novel coronavirus disease 2019 (COVID-19) outbreak is spreading  
16 rapidly throughout China and the world. Hence, early surveillance and public health  
17 emergency disposal are considered crucial to curb this emerging infectious disease.  
18 However, studies that investigated the early surveillance and public health emergency  
19 disposal for the prevention and control of the COVID-19 outbreak in China are  
20 relatively few. We aimed to compare the strengths and weaknesses of early

21 surveillance and public health emergency disposal for prevention and control between  
22 COVID-19 and H7N9 avian influenza, which was commended by the international  
23 community, in China.

24 **Methods:** A case-comparison study was conducted using a set of six key time nodes  
25 to form a reference framework for evaluating early surveillance and public health  
26 emergency disposal between H7N9 avian influenza (2013) in Shanghai, China and  
27 COVID-19 in Wuhan, China.

28 **Findings:** A report to the local Center for Disease Control and Prevention, China, for  
29 the first hospitalized patient was sent after 6 and 20 days for H7N9 avian influenza  
30 and COVID-19, respectively. In contrast, the pathogen was identified faster in the  
31 case of COVID-19 than in the case of H7N9 avian influenza (12 days vs. 31 days).  
32 The government response regarding COVID-19 was 10 days later than that regarding  
33 avian influenza. The entire process of early surveillance and public health emergency  
34 disposal lasted 5 days longer in COVID-19 than in H7N9 avian influenza (46 days vs.  
35 41 days).

36 **Conclusions:** The identification of the unknown pathogen improved in China  
37 between the outbreaks of avian influenza and COVID-19. The longer emergency  
38 disposal period in the case of COVID-19 could be attributed to the government's  
39 slower response to the epidemic. Improving public health emergency management  
40 could lessen the adverse social effects of emerging infectious diseases and public  
41 health crisis in the future.

42

43 **Keywords:** COVID-19; Emerging infectious diseases; H7N9; Emergency  
44 management; China

45

46 **Contributors:**

47 TZ, WS, and LL designed the project, processed and analyzed the data, and wrote the  
48 manuscript. YW, GB, RD, and QW edited the manuscript. All authors revised the  
49 draft.

50

## 51 **Introduction**

52 In the past 20 years, China has experienced several public health crises due to  
53 infectious disease outbreaks, such as severe acute respiratory syndrome in 2003,  
54 H1N1 swine influenza in 2009, and H7N9 avian influenza in 2013, seriously  
55 impacting health, economy, and global security. (1-3) These outbreaks challenged the  
56 health emergency management in several countries, especially developing countries,  
57 including China. (4, 5) In late December 2019, the novel coronavirus disease 2019  
58 (COVID-19) emerged in Wuhan City, China, and rapidly spread throughout China and  
59 the world. (6) Prior to March 5, 2020, the Chinese government reported 80,409  
60 confirmed cases and 3,012 fatalities due to COVID-19. (7)

61 COVID-19 and H7N9 avian influenza are emerging infectious diseases that share  
62 similar characteristics (Table 1), such as probable development of severe respiratory  
63 diseases and susceptibility regardless of age. However, the socioeconomic losses were

64 higher in COVID-19 than in H7N9 avian influenza. An effective public health  
65 emergency management reduces the adverse impact of emerging infectious diseases  
66 (8). This management relies on the early surveillance and timely information  
67 dissemination available in a given period. (9) The following three key responses are  
68 often analyzed to evaluate the efficiency of public health emergency disposal: (1) time  
69 taken by the hospital to report an emerging infectious disease, (2) time taken to  
70 identify the pathogen, and (3) time taken by the government to respond. (10-12)The  
71 World Health Organization declared a Public Health Emergency of International  
72 Concern on January 30, 2020. (13) Since then, China established and strengthened the  
73 national and local surveillance systems as well as emergency responses to prevent and  
74 control the spread of COVID-19. (14) Comparing the infectious disease surveillance  
75 and public health emergency disposal between different outbreaks in China could  
76 assist in improved public health strategies and decision-making by the government to  
77 prevent and control future epidemics, both in China and the world. To the best of our  
78 knowledge, few studies have been conducted to investigate the early disease  
79 surveillance and public health emergency disposal between other epidemics and  
80 COVID-19 in China.

81 In the present study, we aimed to compare the key time nodes of early  
82 surveillance and public health emergency disposal to prevent and control between  
83 COVID-19 and H7N9 avian influenza.

84

85 **Table 1. Characteristics of the H7N9 avian influenza and coronavirus disease**  
86 **2019 in China.**

| <b>Characteristics</b>       | <b>H7N9</b>                | <b>COVID-19</b>              |
|------------------------------|----------------------------|------------------------------|
| Country of origin            | China                      | China                        |
| First case in China          | February 2013 in Shanghai  | December 2019 in Wuhan       |
| Viral genome                 | Negative segmented RNA     | Positive single-stranded RNA |
| Pathogen identification      | CDC, China; March 29, 2013 | CDC, China; January 7, 2020  |
| Human-to-human transmission  | Limited                    | High                         |
| Genesis/source               | Domestic poultry           | Unclear (so far)             |
| Method of diagnosis in China | Real-time PCR              | Real-time PCR                |
| Vaccines in China            | Not yet available          | Not yet available            |

87

## 88 **Methods**

### 89 **Data collection**

90 Data regarding the public health emergency disposal of the novel COVID-19 in  
91 Wuhan City, China, were obtained from published literature, secondary statistical data,  
92 WHO reports, (3) official websites (e.g., National Health Commission of the People's  
93 Republic of China [<http://en.nhc.gov.cn/>], Chinese Center for Disease Control and  
94 Prevention [CDC] [<http://www.chinacdc.cn/en/>], Health Commission of Hubei

95 Province, and Wuhan Municipal Health Commission), and credible media reports in  
96 China (CCTV, People's Daily, CBN, YiMagazine). Data regarding H7N9 avian  
97 influenza in Shanghai, China, were obtained from our published literature. (15)

## 98 **Comparative analysis**

99 We compared the six key time nodes during the entire period from the detection  
100 of the first case to the launch of the health emergency response between COVID-19 in  
101 Wuhan City and H7N9 avian influenza in Shanghai. They were as follows:  
102 hospitalization of the first case, hospital report to the local CDC, laboratory  
103 identification of the pathogen, technical recheck of the pathogen, confirmation and  
104 notification of the pathogen, and launch of emergency disposal through the Chinese  
105 government.

106 We further evaluated the following three crucial periods during the public health  
107 emergency disposal of emerging infectious diseases: time taken by the hospital to  
108 report a case to the local CDC, time taken to identify the pathogen i.e., organization of  
109 the CDC laboratory to detect and recheck the pathogen, and time taken by the  
110 government to respond i.e., implementation of the emergency response once the  
111 pathogen is confirmed. Moreover, we calculated the number of days during each time  
112 node using the hospitalization time reference of the first case as the benchmark. The  
113 duration between detecting the first case and report the first death was also analyzed  
114 in the study.

## 115 **Results**

116 The comparison of three crucial periods between COVID-19 in Wuhan City and

117 H7N9 avian influenza in Shanghai are shown in Table 2 and Figure 1. The entire  
118 process of early surveillance and public health emergency disposal was 5 days longer  
119 in the case of COVID-19 than in the case of H7N9 avian influenza (46 days vs 41  
120 days). The details regarding the comparative analysis using the set of six key time  
121 nodes and three crucial time periods are as follows.

## 122 **Hospital to CDC reporting period**

### 123 **H7N9 avian influenza**

124 The first patient was hospitalized at the Fifth People's Hospital of Shanghai  
125 affiliated to Fudan University on February 21, 2013. Subsequently, two patients were  
126 admitted. (16, 17)

127 *The doctor on duty in the emergency department observed that a paternal*  
128 *relationship existed between the follow-up case and the first case and believed that*  
129 *there was a possibility of transmission. Hence, in the early hours of February 26,*  
130 *2013 at 1:10 a.m., he reported his findings to the doctor on duty who was also the*  
131 *chief of the infection department of the said hospital. He believed that the above*  
132 *situation was consistent with the possibility of clustered unexplained pneumonia cases*  
133 *and immediately called the attention of the administrators in charge of the hospital.*  
134 *Subsequently, the hospital gained expert consultation and undertook protective*  
135 *measures. At 2:30 a.m. of the same day, the hospital administrators contacted the*  
136 *chief administrative official of the local CDC by telephone and requested the start of*  
137 *epidemiological survey and sampling. (18)*

### 138 **Coronavirus disease 2019 (COVID-19)**

139 The Wuhan Municipal Health Administration announced on January 11, 2020  
140 that the first confirmed case of novel coronavirus pneumonia was detected on  
141 December 8, 2019. (18) A literature published in *The Lancet* reported that the first  
142 case was detected on December 1, 2019. (19) Based on the principle of caution, this  
143 article used December 8, 2019 as the onset time of the first case of the epidemic and  
144 considered that this patient was hospitalized at that time.

145 *On the morning of December 26, 2019, Dr. Jixian Zhang, a doctor from Hubei*  
146 *Hospital of Integrated Traditional Chinese and Western Medicine in Wuhan City,*  
147 *observed an abnormality in a couple's lung computed tomography (CT) scan and an*  
148 *abnormality in their son's CT scan as well. Hence, the next day, the hospital reported*  
149 *four abnormal CT findings to the local CDC including another case. (20)*

150

151 Hence, the time taken by the hospital to report the first case of H7N9 (2013) in  
152 Shanghai and COVID-19 (2019) in Wuhan was 6 and 20 days, respectively.

### 153 **Pathogen identification period**

#### 154 **H7N9 avian influenza**

155 The local CDC conducted an epidemiological survey and sampling at 4:00 a.m.  
156 on February 26, 2013 and informed the hospital at 10:30 a.m. that adenovirus,  
157 syncytial virus, Legionella, H1N1, highly pathogenic avian influenza virus,  
158 Mycoplasma, and seasonal influenza virus tested negative. The hospital subsequently  
159 sent the samples to the P3 Laboratory of Shanghai Public Health Clinical Center. On  
160 March 22, the Shanghai Public Health Clinical Center preliminarily confirmed the



161 pathogen as a new type of avian influenza virus. On March 29, 2013, the National  
162 CDC isolated a new type of avian influenza virus from samples collected from  
163 patients.

#### 164 **COVID-19**

165 The local CDC was unable to identify the pathogen on December 26, 2019 and  
166 subsequently sent the samples to various testing institutions, including Shanghai  
167 Public Health Clinical Center and the Chinese Academy of Sciences (Wuhan Virus  
168 Institute). Various testing institutions had identified the novel coronavirus and the  
169 complete genome sequence between December 30, 2019 and January 5, 2020. (20) On  
170 January 7, 2020, the National CDC isolated a new type of coronavirus from the  
171 patients' samples. (22)

172

173 Hence, the time taken to identify the pathogen in the cases of H7N9 (2013) in  
174 Shanghai and COVID-19 (2019) in Wuhan was 31 and 12 days, respectively.

#### 175 **Government response period**

##### 176 **H7N9 avian influenza**

177 On March 31, 2013, the National Health Administration confirmed that the  
178 pathogen was a new type of avian influenza virus. On April 2, 2013, the government  
179 of Shanghai launched a level-three response to public health emergencies.

##### 180 **COVID-19**

181 On January 8, 2020, the National Health Administration confirmed that the

182 pathogen was a novel coronavirus. On January 22, 2020, the government of Hubei  
183 Province launched a level-two response to public health emergencies. (22)

184 Hence, the time taken by the government to respond in the cases of H7N9 (2013)  
185 in Shanghai and COVID-19 (2019) in Wuhan City was 4 and 14 days, respectively.

186 We compared the government's emergency response process between outbreaks  
187 of Shanghai H7N9 avian influenza in 2013 and Wuhan COVID-19 in 2019. The time  
188 taken from the detection of the first case to the implementation of public health  
189 emergency response was 41 and 46 days for H7N9 avian influenza and COVID-19,  
190 respectively. The hospital to CDC reporting period was 14 days slower in the case of  
191 COVID-19 than in the case of H7N9 avian influenza. The time taken to identify the  
192 pathogen was 19 days faster in the case of COVID-19 than in the case of H7N9 avian  
193 influenza. Lastly, the time taken by the government to respond was 10 days slower in  
194 the case of COVID-19 than in the case of H7N9 avian influenza (Figure 2).

195 **Table 2. Comparison of the key time nodes of emergency disposal between H7N9 avian influenza (2013) in Shanghai and coronavirus**  
 196 **disease 2019 in Wuhan.**

197

| Key time nodes                                                                      | Three crucial periods            | Shanghai H7N9 avian influenza (2013)                                                                                                                                            |                       | Wuhan novel coronavirus pneumonia (2019)                                                                                                                                                |                       |
|-------------------------------------------------------------------------------------|----------------------------------|---------------------------------------------------------------------------------------------------------------------------------------------------------------------------------|-----------------------|-----------------------------------------------------------------------------------------------------------------------------------------------------------------------------------------|-----------------------|
|                                                                                     |                                  | Dates and events                                                                                                                                                                | Cumulative time (day) | Dates and events                                                                                                                                                                        | Cumulative time (day) |
| 1 ) Hospitalization of the first patient                                            | Hospital to CDC reporting period | On February 21, the Fifth People's Hospital Affiliated to Fudan University (Shanghai) admitted a patient                                                                        | 1                     | On December 8, as confirmed by the Wuhan Health and Medical Commission on January 11 (based on <i>The Lancet</i> paper, Wuhan's first new coronavirus case was confirmed on December 1) | 1                     |
| 2 ) Hospital reporting to the local Center for Disease Control and Prevention (CDC) |                                  | On February 26, the Fifth People's Hospital Affiliated to Fudan University (Shanghai) submitted a report to the District CDC and requested for an epidemiological investigation | 6                     | On December 27, the Hubei Hospital of Integrated Traditional Chinese and Western Medicine (Wuhan) reported four abnormal cases to the District CDC                                      | 20                    |
| 3 ) Laboratory identification of the pathogen                                       | Pathogen identification speed    | On March 22, the P3 Laboratory of Shanghai Public Health Clinical Center initially identified it as a new avian influenza virus                                                 | 30                    | On January 5, a novel coronavirus was initially identified by various institutions including Shanghai Public Health Clinical Center                                                     | 29                    |

|                                                         |                            |                                                                                                                     |    |                                                                                                      |    |
|---------------------------------------------------------|----------------------------|---------------------------------------------------------------------------------------------------------------------|----|------------------------------------------------------------------------------------------------------|----|
| 4 ) <b>Technical recheck of pathogen</b>                |                            | On March 29, the National CDC isolated a new type of avian influenza virus from the patients' samples               | 37 | On January 7, the National CDC isolated a novel coronavirus from the patients' samples               | 31 |
| 5 ) <b>National confirmation of the pathogen</b>        | Government response period | On March 31, the National Health Administration confirmed that the pathogen was a new type of avian influenza virus | 39 | On January 8, the National Health Administration confirmed that the pathogen was a novel coronavirus | 32 |
| 6 ) <b>Local government launched emergency response</b> | Government response period | On April 2, Shanghai launched a level-three response to public health emergencies                                   | 41 | On January 22, Hubei Province launched a level-two emergency response to public health emergencies   | 46 |

198

199

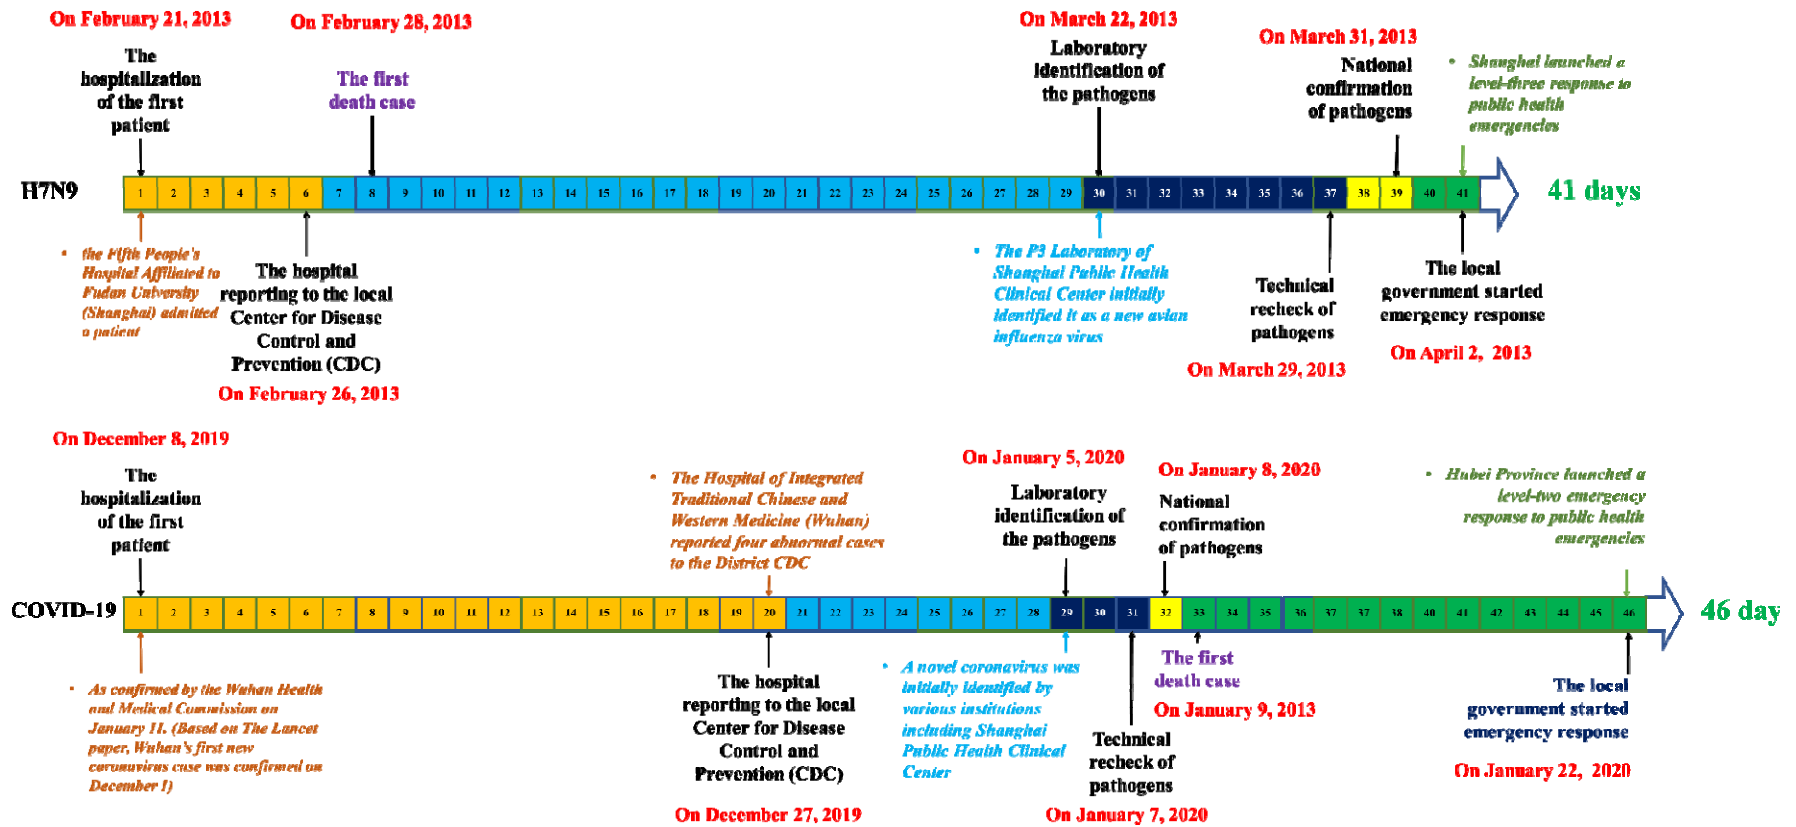

200

201 Figure 1. Comparison of the emergency disposal timeline between H7N9 avian influenza (2013) in Shanghai and coronavirus disease

202 2019 in Wuhan.

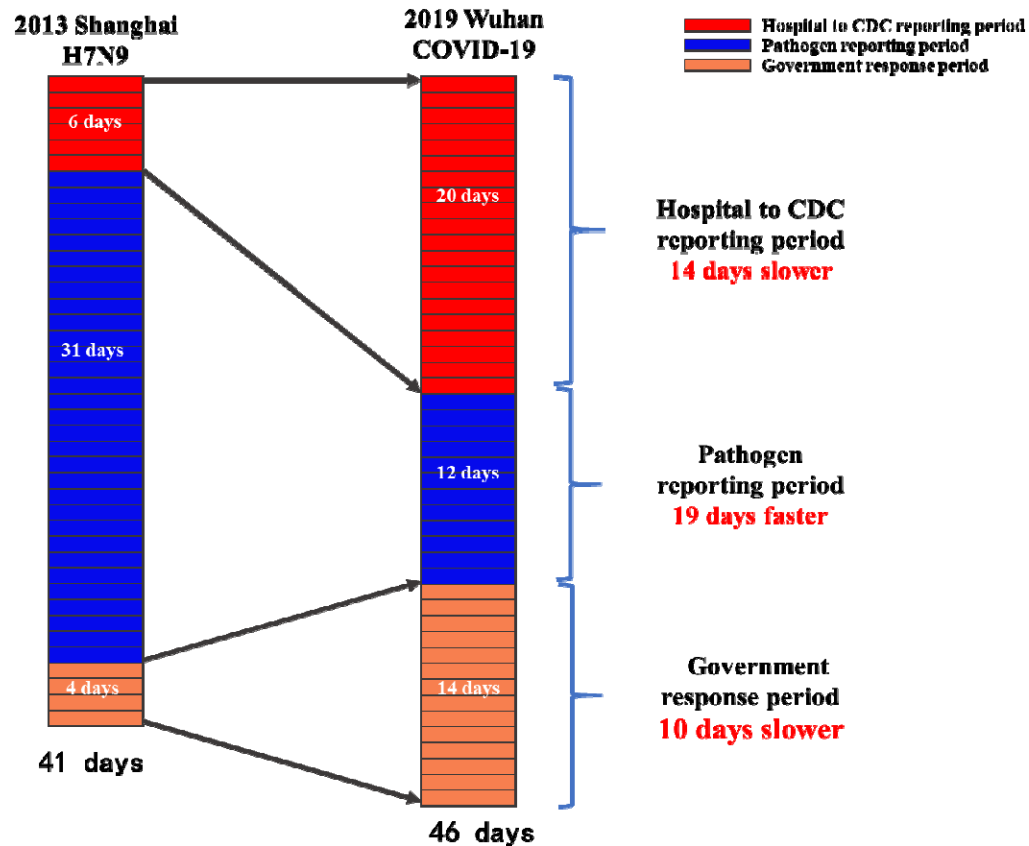

203

204 **Figure 2. Comparison of three critical emergency disposal speed between H7N9 avian influenza (2013) in Shanghai versus coronavirus**  
 205 **disease 2019 in Wuhan.**

206

## 207 **Discussion**

208 To the best of our knowledge, this was one of the few studies conducted in  
209 China to compare the strengths and weaknesses of public health emergency disposal  
210 between COVID-19 and H7N9 avian influenza. In this case-comparative study, the  
211 time taken to detect unknown pathogens had improved between the outbreaks of  
212 H7N9 avian influenza and COVID-19, whereas the time taken for hospitals to report a  
213 case to the local CDC and the government's emergency response was significantly  
214 slow.

215 In this study, we mainly investigated three crucial periods that influence the  
216 efficiency of emergency management to public health crises. During the emergency  
217 response process for H7N9 avian influenza (2013) in Shanghai, the maximum time  
218 was taken to technically identify and recheck the pathogen. The technical  
219 identification of pathogen took 24 days and the rechecking took 7 days, which  
220 accounted for 76% of the whole emergency process. In contrast, the time taken to  
221 technically identify and recheck the pathogen in the case of COVID-19 was reduced  
222 to just 12 days, accounting for 24% of the whole emergency process.

223 Laboratory identification was 19 days faster in the case of COVID-19 than in the  
224 case of H7N9 avian influenza, whereas the total disposal time was 5 days longer in  
225 the case of COVID-19 than in the case of H7N9 avian influenza. This could be  
226 attributed to the decrease in the reporting periods of certain hospitals and the increase  
227 in responding periods of the local governments. The time taken by the hospital to  
228 report a case to the local CDC was 14 days slower during COVID-19 than during  
229 H7N9 avian influenza (19 days vs. 5 days, respectively). Furthermore, the response  
230 period of the local government launching emergency management was 14 days during

231 COVID-19, which was 10 days longer than that during H7N9 avian influenza.  
232 Combining the hospital to CDC reporting period and government response period of  
233 H7N9 avian influenza with the pathogen identification period of COVID-19 would  
234 result in the entire epidemic control taking less than 22 days. Moreover, Hubei  
235 Province could thus launch an emergency response on December 30, suggesting that  
236 approximately 27 cases of COVID-19 would be detected in Hubei Province and the  
237 number of close contacts would be approximately 1350 by early March 2020. The  
238 Wuhan Municipal Infectious Diseases Hospital alone had 350 beds, which was  
239 sufficient to handle full admission. Subsequently, the local CDC also had sufficient  
240 capabilities to screen and isolate most of the patients in close contacts with the  
241 infected patients.

242 The 5-day longer emergency period during COVID-19 could possibly be  
243 attributed to the hospital to CDC reporting period and government response period  
244 constrained by the following objective conditions:

245 (1) At the beginning stage of the epidemic, H7N9 appeared a larger threat. The  
246 duration between the first identified case and the first reported death was only 7 days  
247 (on February 28, 2013, the first death case was observed). For COVID-19, this  
248 duration was 32 days instead. On January 9, local medical institutions and disease  
249 control departments were instructed to speed up and implement isolation and  
250 precautionary measures. (20)

251 (2) Because of underreporting of cases considering the challenges in data  
252 collection and shortage of testing kits and reagents in Hubei Province. Furthermore,  
253 the local medical supplies, beds, and facilities were insufficient, which were even  
254 exacerbated by the lockdown of the province, preventing the reach of supplies from



255 several other hospitals.

256 This study has several potential limitations. First, the assessment coverage was at  
257 the city level; thus, comparison between the national level and the grassroots level was  
258 not assessed in this study. The grassroots level is the first gateway of public health  
259 emergency, and the effective measures and emergency responses taken by the  
260 grassroots level are considered important. Second, we used six-time nodes to evaluate  
261 the process of the government's emergency response, which is relatively limited when  
262 evaluating the possibility of an epidemic of major infectious diseases. Third, the data  
263 are based on China's official and authoritative reports, coupled with retrospective  
264 studies, which inevitably had information bias. Considering all these limitations, the  
265 findings should be interpreted with caution before additional studies are conducted.

## 266 **Conclusions**

267 The identification of the unknown pathogen has significantly improved in China  
268 between the outbreaks of H7N9 avian influenza and COVID-19. However, the time  
269 taken for epidemic reports from certain hospitals to reach the local CDC as well as the  
270 decision-making process by the local government in Hubei Province was reduced,  
271 which might be one of the vital factors for widespread COVID-19 cases. These issues  
272 need to be addressed urgently to prepare for public emergencies to prevent and control  
273 future epidemics of emerging infectious diseases in China and the world.

## 274 **Conflict of interests**

275 The authors declare no competing financial interest.

## 276 **Acknowledgment**

277 This study was supported by the National Natural Science Foundation of China  
278 (Nu:71874033) and Key project of Philosophy and Social Science Research of the  
279 Ministry of Education (Nu:15JZD029).

280

281

## 282 **References**

283 1.Li Z, Gao GF. Infectious disease trends in China since the SARS outbreak. LANCET INFECT DIS. [Journal Article;  
284 Comment]. 2017 2017-11-01;17(11):1113-5.

285 2.Al-Tawfiq JA, Zumla A, Gautret P, Gray GC, Hui DS, Al-Rabeeh AA, et al. Surveillance for emerging respiratory  
286 viruses. LANCET INFECT DIS. [Journal Article; Research Support, Non-U.S. Gov't; Review]. 2014  
287 2014-10-01;14(10):992-1000.

288 3.Rudge JW, Coker R. Human to human transmission of H7N9. BMJ. [Editorial; Research Support, Non-U.S. Gov't;  
289 Comment]. 2013 2013-08-06;347: f4730.

290 4.Yu H, Cowling BJ, Feng L, Lau EH, Liao Q, Tsang TK, et al. Human infection with avian influenza A H7N9 virus: an  
291 assessment of clinical severity. LANCET. [Journal Article; Research Support, N.I.H., Extramural; Research Support,  
292 Non-U.S. Gov't]. 2013 2013-07-13;382(9887):138-45.

293 5.Zhong NS, Zheng BJ, Li YM, Poon, Xie ZH, Chan KH, et al. Epidemiology and cause of severe acute respiratory  
294 syndrome (SARS) in Guangdong, People's Republic of China, in February 2003. LANCET. [Journal Article; Research  
295 Support, U.S. Gov't, P.H.S.]. 2003 2003-10-25;362(9393):1353-8.

296 6.Hui DS, I AE, Madani TA, Ntoumi F, Kock R, Dar O, et al. The continuing 2019-nCoV epidemic threat of novel  
297 coronaviruses to global health - The latest 2019 novel coronavirus outbreak in Wuhan, China. INT J INFECT DIS.  
298 [Editorial]. 2020 2020-02-01; 91:264-6.

299 7.Latest information of the prevalence of pneumonia caused by the COVID-19 as of 12AM MARCH 5.; 2020.

300 8.Verikios G, Sullivan M, Stojanovski P, Giesecke J, Woo G. Assessing Regional Risks From Pandemic Influenza: A  
301 Scenario Analysis. The World Economy. 2016;39(8):1225-55.

302 9.Qiu W CCHX. A Comparison of China's Risk Communication in Response to SARS and H7N9 Using Principles  
303 Drawn from International Practice[J]. Disaster Med Public Health Prep. (2017):1-12.

- 304 10. Health MO. Guideline for national surveillance, excluding and management on unknown etiology pneumonia[S].  
305 Beijing; 2007.
- 306 11. Xiang N HFCT. Use of National Pneumonia Surveillance to Describe Influenza A(H7N9) Virus Epidemiology, China,  
307 2004–2013. EMERG INFECT DIS. 2013;11(19).
- 308 12. Lessons from an active surveillance pilot to assess the pneumonia of unknown etiology surveillance system in China,  
309 2016: the need to increase clinician participation in the detection and reporting of emerging respiratory infectious  
310 diseases[J]. BMC infectious disease. 2019;1(19):770.
- 311 13. WHO. Statement on the second meeting of the International Health Regulations (2005) Emergency Committee  
312 regarding the outbreak of novel coronavirus (2019-nCoV).; 2020.
- 313 14. LU X, XUE L. Managing the unexpected: sense-making in the Chinese emergency management system. PUBLIC  
314 ADMIN. 2016;94(2):414-29.
- 315 15. Luo L, Tian J, Li F, Zhou Y, Jin C, Wen W, et al. Suggestions of improving epidemic pathogen detection based on the  
316 experience of H7N9 in Shanghai. China Health Resource. 2014 2014-09-20;17(05):337-9.
- 317 16. Gao R, Cao B, Hu Y, Feng Z, Wang D, Hu W, et al. Human infection with a novel avian-origin influenza A (H7N9)  
318 virus. N Engl J Med. [Case Reports; Journal Article; Research Support, Non-U.S. Gov't; Research Support, U.S. Gov't,  
319 P.H.S.]. 2013 2013-05-16;368(20):1888-97.
- 320 17. Chen Y, Liang W, Yang S, Wu N, Gao H, Sheng J, et al. Human infections with the emerging avian influenza A  
321 H7N9 virus from wet market poultry: clinical analysis and characterisation of viral genome. LANCET. [Comparative  
322 Study; Journal Article; Research Support, Non-U.S. Gov't]. 2013 2013-06-01;381(9881):1916-25.
- 323 18. Experts interpret the latest notice of viral pneumonia of unknown causes.; 2020.
- 324 19. Huang C, Wang Y, Li X, Ren L, Zhao J, Hu Y, et al. Clinical features of patients infected with 2019 novel coronavirus  
325 in Wuhan, China. LANCET. [Journal Article; Research Support, Non-U.S. Gov't]. 2020  
326 2020-02-15;395(10223):497-506.
- 327 20. YiMagazine C. Wuhan epidemic core timeline.; 2020.
- 328 21. China's response to COVID-19 gains international recognition. [EB/OL].; 2020.
- 329 22. CCTV. Novel coronavirus! Preliminary determination of the "culprit" of unexplained pneumonia in Wuhan [EB/OL].;  
330 2020.
- 331 23. Circular of Hubei Provincial People's Government on Strengthening Pneumonia Prevention and Control of New  
332 Coronavirus Infection [EB/OL].; 2020.
